# Supplementary material for: Diabetes mellitus stimulates pancreatic cancer growth and epithelial-mesenchymal transition-mediated metastasis via a p38 MAPK pathway
Source: PubMed Central journal article supplement (PMC5122409; doi:10.18632/oncotarget.9533), 2016-05-21
Supplement: oncotarget-07-38539-s001.pdf [file oncotarget-07-38539-s001.pdf]

## Diabetes mellitus stimulates pancreatic cancer growth and epithelial-mesenchymal transition-mediated metastasis via a p38 MAPK pathway

### SUPPLEMENTARY FIGURES

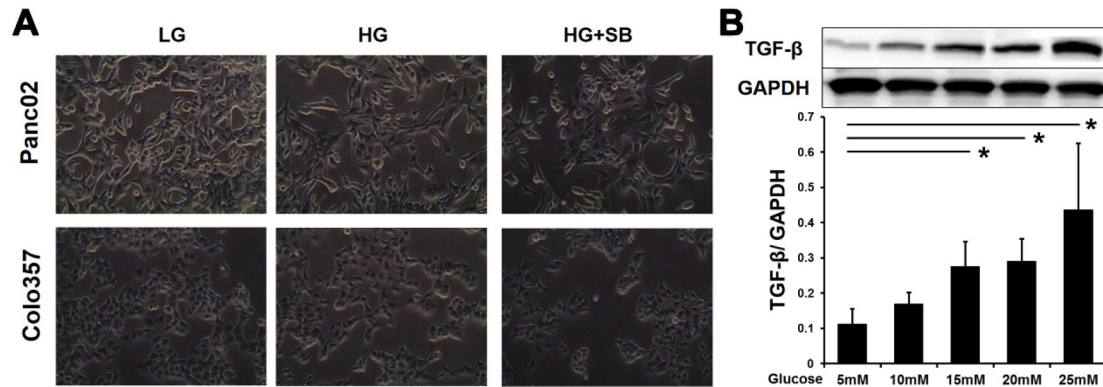

**Supplementary Figure S1:** **A.** Morphological changes in PC cells after culture in low-glucose (LG) medium, high-glucose (HG) medium, or HG medium containing 10  $\mu$ M SB303580 for 24 h (200 $\times$ ). **B.** TGF- $\beta$  expression levels in Panc02 cells after culture in medium with various glucose concentrations (5-25 mM) or HG medium (25 mM) containing 10  $\mu$ M SB303580 for 24 h (n =3/group). \*  $P < 0.05$ .

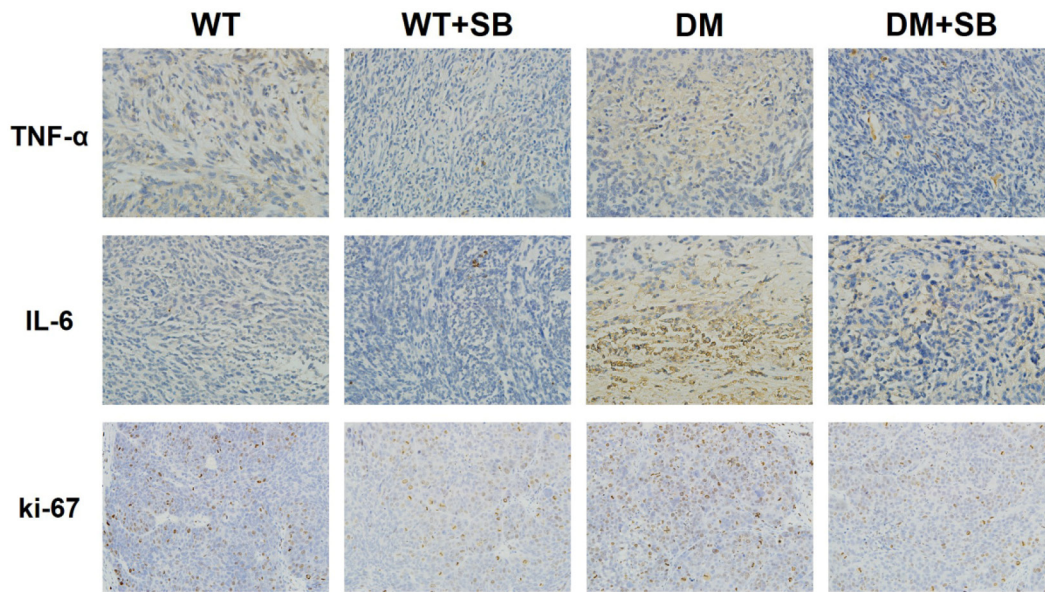

Supplementary Figure S2: Immunohistochemical analysis of TNF- $\alpha$ , IL-6 and Ki-67 expression in primary tumors from the WT, WT+SB, DM and DM+SB groups.
